# Supplementary material
Source: publisher figshare collection journal article supplement (https://acs.figshare.com/ndownloader/files/22780250)
Supplement: Supplementary file 1 [file 22780250]

## **Supporting Information**

### **Continuous Operation on Synthesis and Surface Modification of Rutile Nanoparticles in Designed Microfluidic Reactors**

Wu Zhang\*, Yulian Wang, Haitao Zhao

School of Materials Science and Engineering, Shenyang Ligong University, Shenyang,  
Liaoning, 110159, P. R. China.

The supporting information contains 2 pages, one figure (Figure S1).

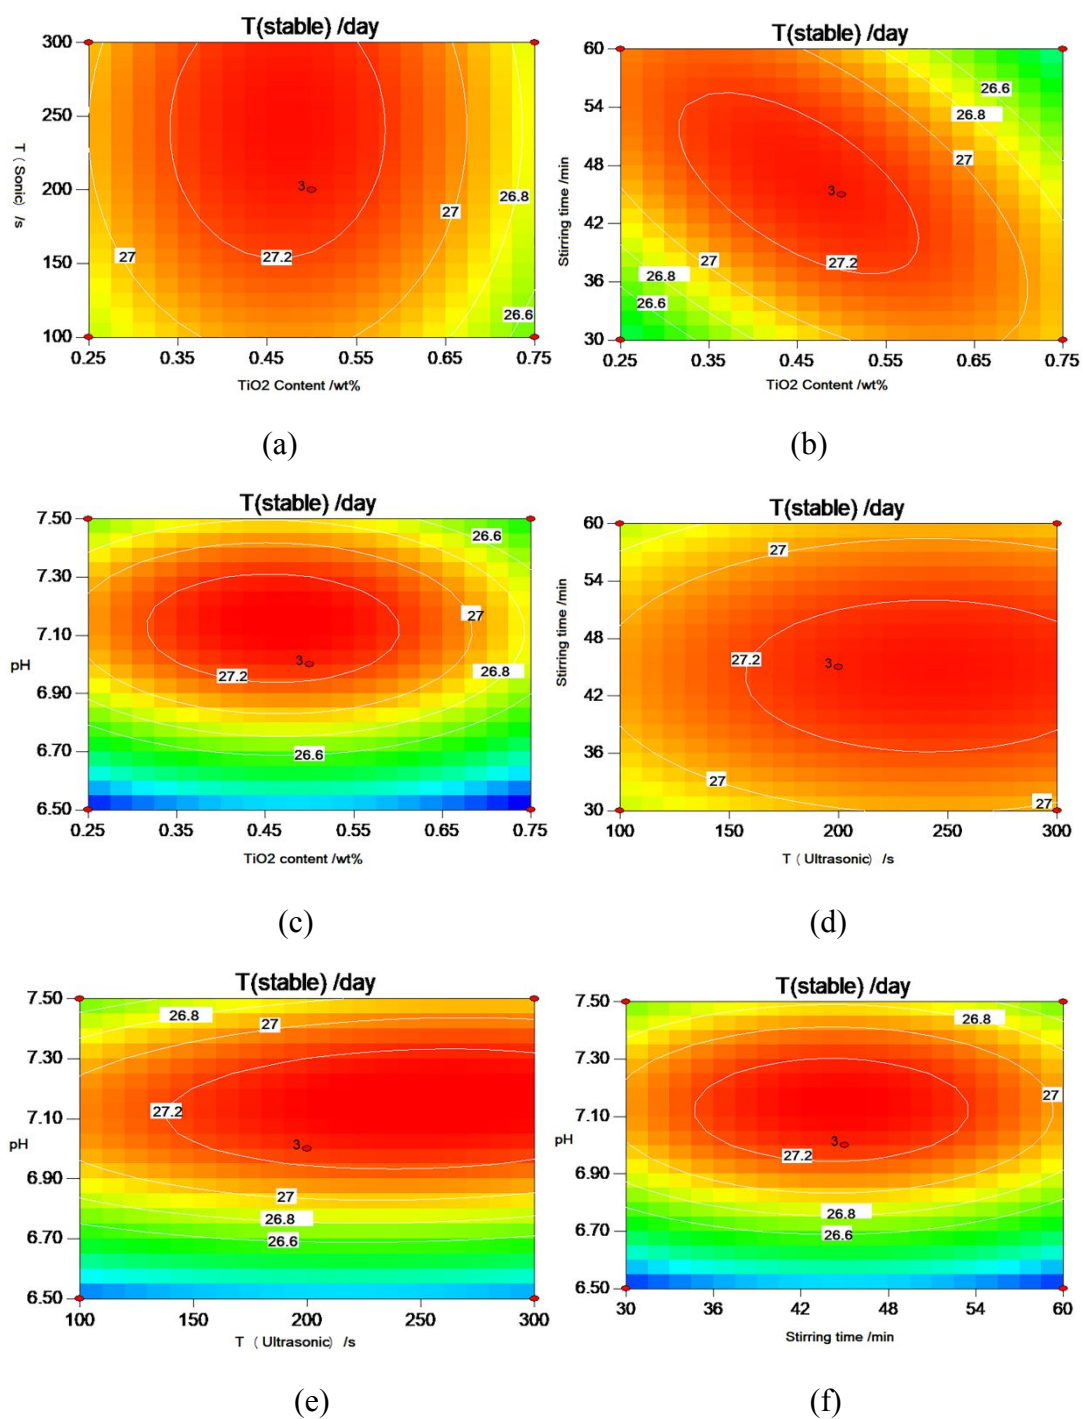

Figure S1 Counter maps of Figure 7 in the manuscript((a):effect of  $\text{TiO}_2$  content and ultrasonic time; (b): effects of  $\text{TiO}_2$  content and stirring time; (c): effect of  $\text{TiO}_2$  content and pH; (d): effect of stirring and ultrasonic time; (e) effect of sonic time of pH; (f) effect of stirring and pH)
